# Supplementary material for: Smoothly shifting fluorescent windows: a tunable “off-on-off” micellar sensor for pH
Source: Royal Society of Chemistry journal article supplement (doi:10.1039/b913195g), 2009-01-01

## ELECTRONIC SUPPLEMENTARY INFORMATION

### Smoothly shifting fluorescent windows: a tunable “off-on-off” micellar sensor for pH

Piersandro Pallavicini, Yuri Antonio Diaz-Fernandez and Luca Pasotti

**1. Fluorescence data fitting.** The experimental  $I_f$  % vs pH data were fitted using a Marquardt-Levenberg Algorithm. The fluorescence bell-like profiles were splitted in two sigmoidal fuctions, each described by the Equation S1. The maxima of the bell were taken as the splitting points for each curve.

The parameters 'a' and 'b' are related to the height and smoothness of the sigmoidal,  $y_0$  is the initial  $I_f$  %, and  $x_0$  represents the pH of the inflection point. The  $y_0$ , A, B,  $x_0$  values that best-fit the experimental profiles, are reported in Table S2.

$$I_f \% = y_0 + \frac{A}{1 + e^{-B(pH-x_0)}} \quad \text{Equation S1}$$

**Table S2.**  $y_0$ , A, B,  $x_0$  best-fitting values, for the  $I_f$ % vs pH profiles obtained at the various SDS molar fractions. Values indicated as “fit DP” are those of the ascending sigmoid in the  $I_f$  % vs pH bell-shaped curve. Values indicated as “fit DDA” are those of the decending part.

| Fit DP | SDS 10     |        | SDS 9 TX100 1 |        | SDS 8 TX100 2 |        | SDS 7 TX100 3 |        | SDS 1 TX100 1 |        |
|--------|------------|--------|---------------|--------|---------------|--------|---------------|--------|---------------|--------|
|        | Std. Error |        | Std. Error    |        | Std. Error    |        | Std. Error    |        | Std. Error    |        |
| a      | 97.1226    | 0.4093 | 89.4245       | 0.3624 | 86.1849       | 0.5908 | 83.9261       | 0.5933 | 76.1549       | 0.3849 |
| b      | 0.3535     | 0.0055 | 0.3904        | 0.005  | 0.3733        | 0.0075 | 0.3941        | 0.0088 | 0.4083        | 0.0057 |
| $x_0$  | 8.2187     | 0.0072 | 7.7147        | 0.006  | 7.241         | 0.0089 | 6.9434        | 0.0102 | 6.4468        | 0.007  |
| $y_0$  | 3.3114     | 0.1558 | 10.3988       | 0.1398 | 13.9347       | 0.2047 | 15.4749       | 0.2306 | 21.9885       | 0.1288 |
| Rsqr . | 0.9999     |        | 0.9999        |        | 0.9997        |        | 0.9996        |        | 0.9998        |        |

| Fit DDA | Std. Error |         | Std. Error |         | Std. Error |        | Std. Error |         | Std. Error |         |
|---------|------------|---------|------------|---------|------------|--------|------------|---------|------------|---------|
|         | a          | 62.5798 | 11.2921    | 54.5949 | 3.7952     | 59.525 | 2.5458     | 56.8011 | 3.4806     | 62.7222 |
| b       | -0.4259    | 0.0807  | -0.4006    | 0.0356  | -0.474     | 0.0339 | -0.3951    | 0.0504  | -0.4782    | 0.0143  |
| $x_0$   | 11.1791    | 0.1277  | 11.1934    | 0.0489  | 10.8763    | 0.0294 | 10.6544    | 0.0499  | 10.166     | 0.0138  |
| $y_0$   | 39.2717    | 9.6378  | 47.5065    | 3.2072  | 42.6234    | 1.8891 | 41.9403    | 2.4857  | 38.7068    | 0.4374  |
| Rsqr .  | 0.99       |         | 0.998      |         | 0.9992     |        | 0.9931     |         | 0.9996     |         |

| SDS 3 TX100 7 |        | SDS 2 TX100 8 |        | SDS 1 TX100 9 |        | SDS 0 TX100 10 |        |
|---------------|--------|---------------|--------|---------------|--------|----------------|--------|
| Std. Error    |        | Std. Error    |        | Std. Error    |        | Std. Error     |        |
| 79.6423       | 1.2336 | 78.3939       | 1.1502 | 77.8354       | 3.8192 | 78.0312        | 5.9232 |
| 0.4477        | 0.0169 | 0.4363        | 0.0155 | 0.4522        | 0.0505 | 0.3943         | 0.0442 |
| 6.2836        | 0.019  | 5.6934        | 0.0159 | 4.5968        | 0.0508 | 3.7184         | 0.0598 |
| 22.9797       | 0.4944 | 21.5093       | 0.5192 | 22.5305       | 3.1344 | 22.7342        | 4.9742 |
| 0.9994        |        | 0.9996        |        | 0.9972        |        | 0.9981         |        |

|         | Std. Error |         | Std. Error |         | Std. Error |         | Std. Error |
|---------|------------|---------|------------|---------|------------|---------|------------|
| 64.9915 | 1.0502     | 64.7977 | 1.2309     | 71.3442 | 2.8718     | 71.2261 | 0.4976     |
| -0.429  | 0.0149     | -0.4146 | 0.0174     | -0.4814 | 0.049      | -0.437  | 0.0075     |
| 9.8694  | 0.0127     | 9.2875  | 0.0182     | 8.5453  | 0.0496     | 7.3628  | 0.0082     |
| 36.3542 | 0.6342     | 33.4492 | 0.6701     | 30.0017 | 1.7284     | 29.6729 | 0.2494     |
| 0.9993  |            | 0.9991  |            | 0.9944  |            | 0.9999  |            |

**Figure S1.** Pyrene fluorescence intensity variation with SDS molar fraction in micellar solutions containing no bases (0.05M NaNO<sub>3</sub>).

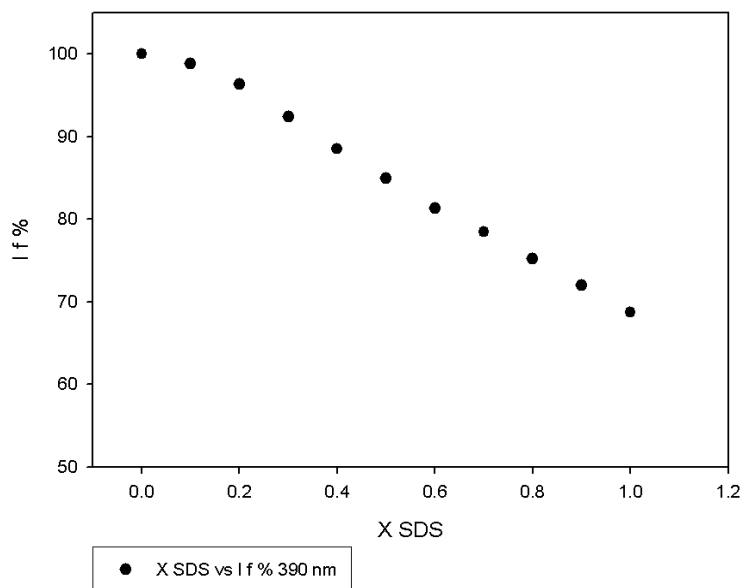

Supplement: b913195g.pdf [file b913195g.pdf]
